# Supplementary material for: Exosome–niosome hybrid oxygen carrier for protection against acetaminophen-induced acute liver injury
Source: Royal Society of Chemistry journal article supplement (doi:10.1039/d5bm01861g), 2026-03-31
Supplement: d5bm01861g1.pdf [file d5bm01861g1.pdf]

## Supplementary Material

# Exosome-Niosome Hybrid Oxygen Carrier for Protection against Acetaminophen-induced Acute Liver Injury

*Anika Bushra, Dalton Jayne, Thomas Locke, Xiaoxue Han, Timothy M. Fan, Gregory H.*

*Underhill, and Joseph Irudayaraj\**

\* Correspondence: [jirudaya@illinois.edu](mailto:jirudaya@illinois.edu)

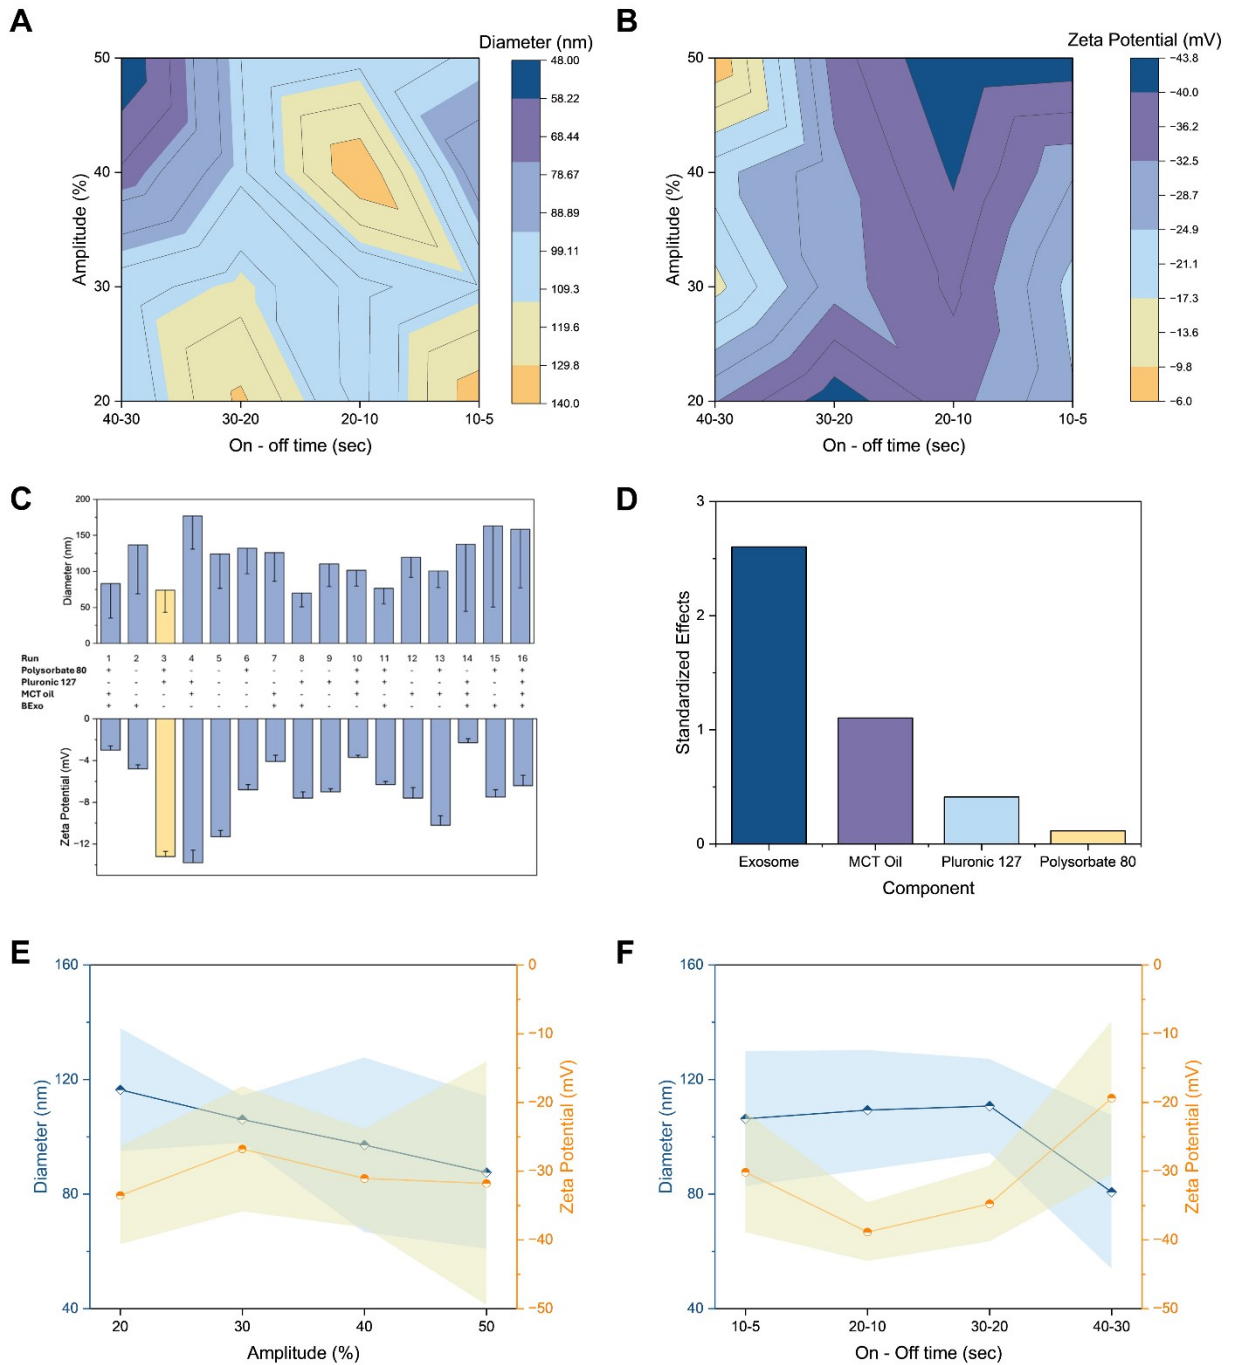

**Fig. S1** Optimization of ENh-OC size (A) and zeta potential (B) by varying sonication amplitude and duration of on-off steps, (C) optimization of ENh-OC size and zeta potential by varying composition, (+) indicates higher concentration level and (-) indicates lower concentration level, (D) standardized effect plot for components of ENh-OC from 2-level full factorial DoE model,

variation of size and zeta potential with amplitude (E), and duration of on-off cycles in sonication (F).

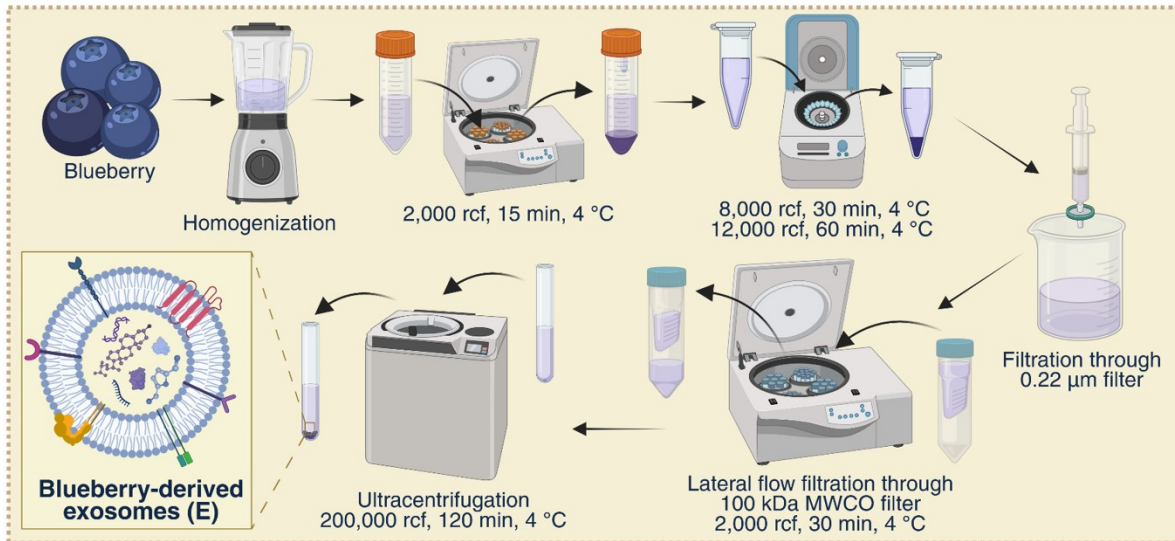

**Fig. S2** Schematic showing the extraction steps for blueberry-derived exosomes. (Created in <https://BioRender.com>.)

**Table. S1** Primers used in the study.

| <b>Gene name</b> | <b>Species</b> | <b>Forward primer</b>                   | <b>Reverse Primer</b>                   |
|------------------|----------------|-----------------------------------------|-----------------------------------------|
| HIF-1 $\alpha$   | Human          | 5' GTC TGA GGG GAC AGG<br>AGG AT 3'     | 5' CTC CTC AGG TGG CTT<br>GTC AG 3'     |
| VEGF-A           | Human          | 5' CGA AAG CGC AAG AAA<br>TCC CG 3'     | 5' GCT CCA GGG CAT TAG<br>ACA GC 3'     |
| Nrf2             | Human          | 5' CAC ATC CAG TCA GAA<br>ACC AGT GG 3' | 5' GGA ATG TCT GCG CCA<br>AAA GCT G 3'  |
| HO-1             | Human          | 5' CCA GGC AGA GAA TGC<br>TGA GTT C 3'  | 5' AAG ACT GGG CTC TCC<br>TTG TTG C 3') |
| IL-1 $\beta$     | Human          | 5' CCA CAG ACC TTC CAG<br>GAG AAT G 3'  | 5' GTG CAG TTC AGT GAT<br>CGT ACA GG 3' |
| TNF- $\alpha$    | Human          | 5' CTC TTC TGC CTG CTG<br>CAC TTT G 3'  | 5' ATG GGC TAC AGG CTT<br>GTC ACT C 3'  |
| $\beta$ -actin   | Human          | 5' GGA TTC CTA TGT GGG<br>CGA CGA 3'    | 5' GCG TAC AGG GAT AGC<br>ACA GC 3'     |
| HIF-1 $\alpha$   | Mouse          | 5' CCT GCA CTG AAT CAA<br>GAG GTT GC 3' | 5' CCA TCA GAA GGA CTT<br>GCT GGC T 3'  |
| VEGF-A           | Mouse          | 5' CTG CTG TAA CGA TGA<br>AGC CCT G 3'  | 5' GCT GTA GGA AGC TCA<br>TCT CTC C 3'  |
| Nrf2             | Mouse          | 5' CAG CAT AGA GCA GGA<br>CAT GGA G 3'  | 5' GAA CAG CGG TAG TAT<br>CAG CCA G 3'  |
| HO-1             | Mouse          | 5' CAC TCT GGA GAT GAC<br>ACC TGA G 3'  | 5' GTG TTC CTC TGT CAG<br>CAT CAC C 3'  |
| IL-1 $\beta$     | Mouse          | 5' TGG ACC TTC CAG GAT<br>GAG GAC A 3'  | 5' GTT CAT CTC GGA GCC<br>TGT AGT G 3'  |
| TNF- $\alpha$    | Mouse          | 5' GGT GCC TAT GTC TCA<br>GCC TCT T 3'  | 5' GCC ATA GAA CTG ATG<br>AGA GGG AG 3' |
| GAPDH            | Mouse          | 5' AAG AAG GTG GTG AAG<br>CAG GCA TC 3' | 5' CGA AGG TGG AAG AGT<br>GGG AGT TG 3' |
